# Supplementary material for: Effects of aging and calorie restriction on the global gene expression profiles of mouse testis and ovary
Source: PubMed Central journal article supplement (PMC2426674; doi:10.1186/1741-7007-6-24), 2008-06-03
Supplement: 1741-7007-6-24-S18.pdf [file 1741-7007-6-24-S18.pdf]

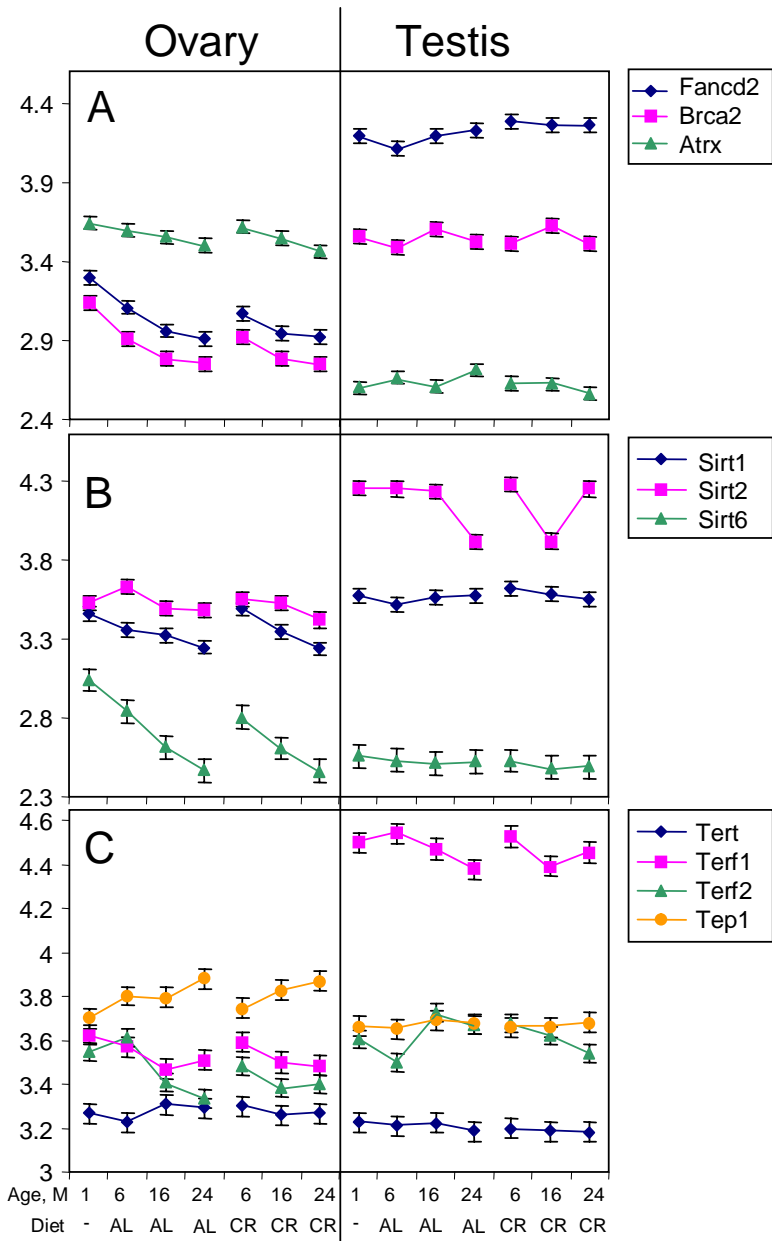

**Supplemental Figure S5**

Expression of genes associated with aging and DNA damage control in ovary and testis in mice from 1 to 24 month old on *ad libitum* (AL) or calorie restriction (CR) diet. Genes were selected arbitrarily to represent each category. (A) genes involved in human diseases, (B) sirtuin family genes, and (C) telomerase-related genes.
