# Supplementary material for: Effects of aging and calorie restriction on the global gene expression profiles of mouse testis and ovary
Source: PubMed Central journal article supplement (PMC2426674; doi:10.1186/1741-7007-6-24), 2008-06-03

## Ovary

## Ovary

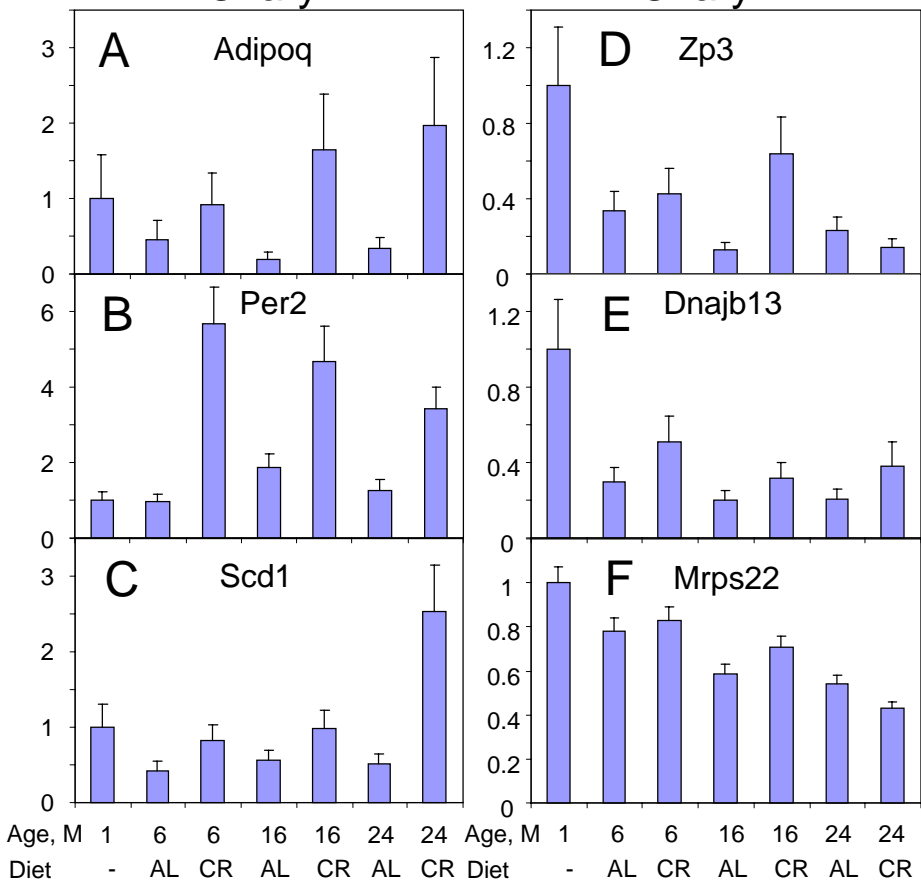

## Testis

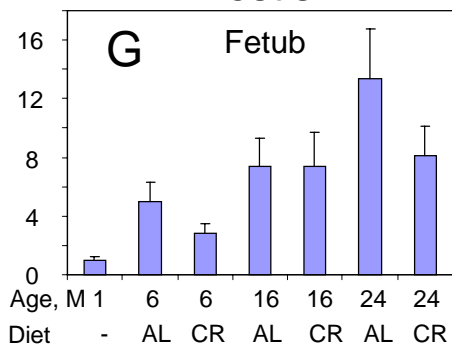

Supplement: 1741-7007-6-24-S20.pdf [file 1741-7007-6-24-S20.pdf]
